# Supplementary material
Source: PubMed Central journal article supplement (PMC2857119)
Supplement: supp_M110.105189_jbc.M110.105189-1.pdf [file supp_M110.105189_jbc.M110.105189-1.pdf]

**Figure S1**

Tryptic peptide with no missed cleavage with the characteristic phosphorylation on the Threonine 191 residue from *in vitro* phosphorylated MabA (Monoisotopic mass : 2671.28 Da, MS/MS of the triply charged ion at m/z 891.7).

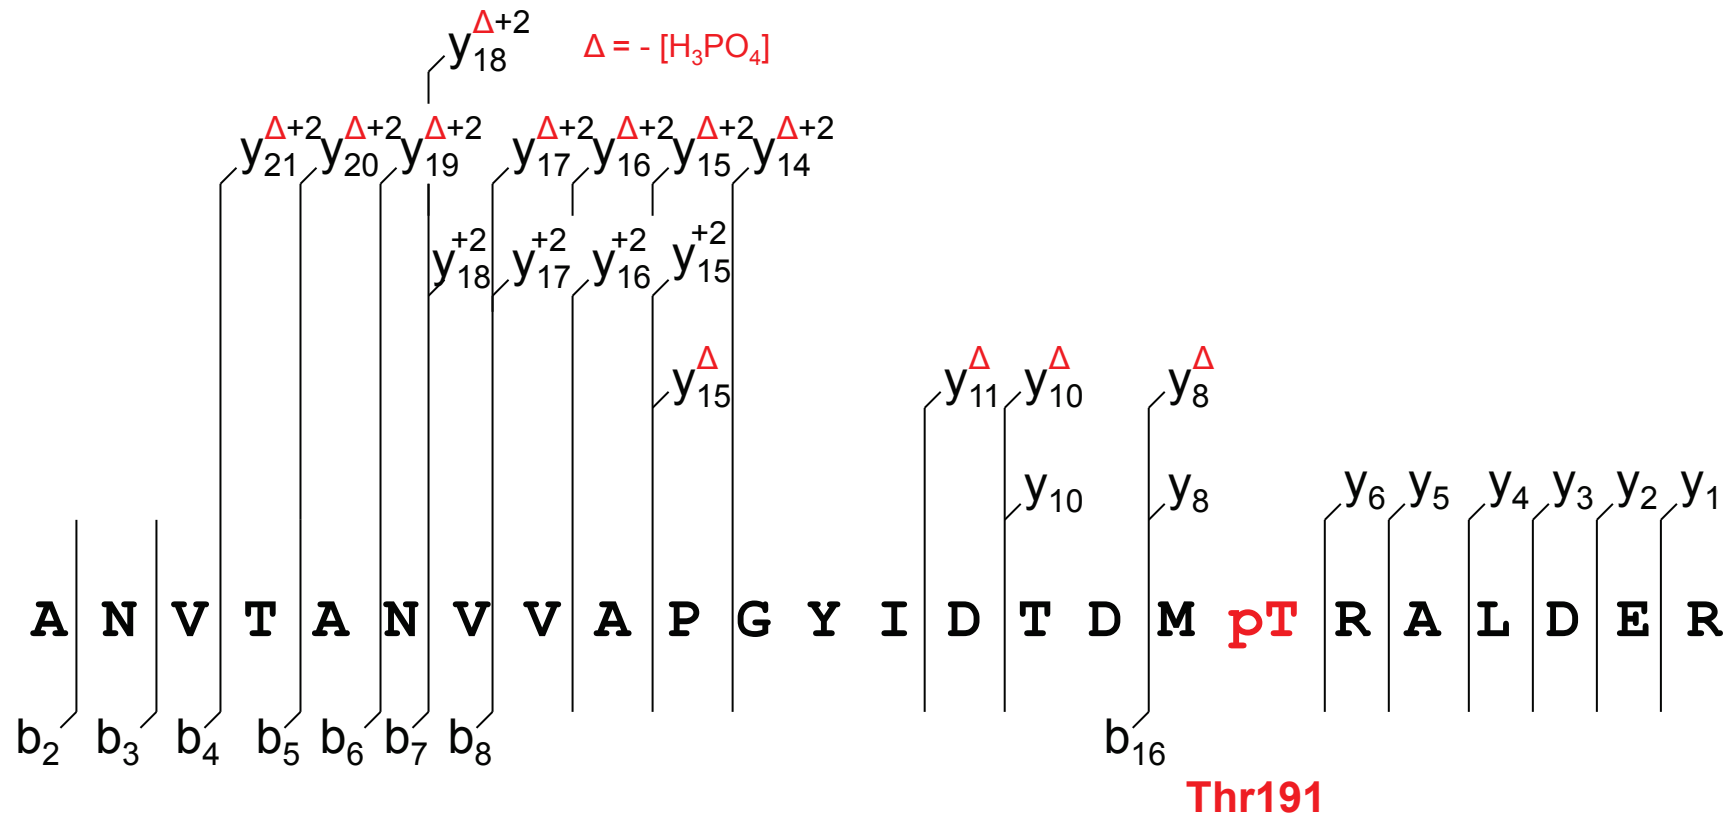

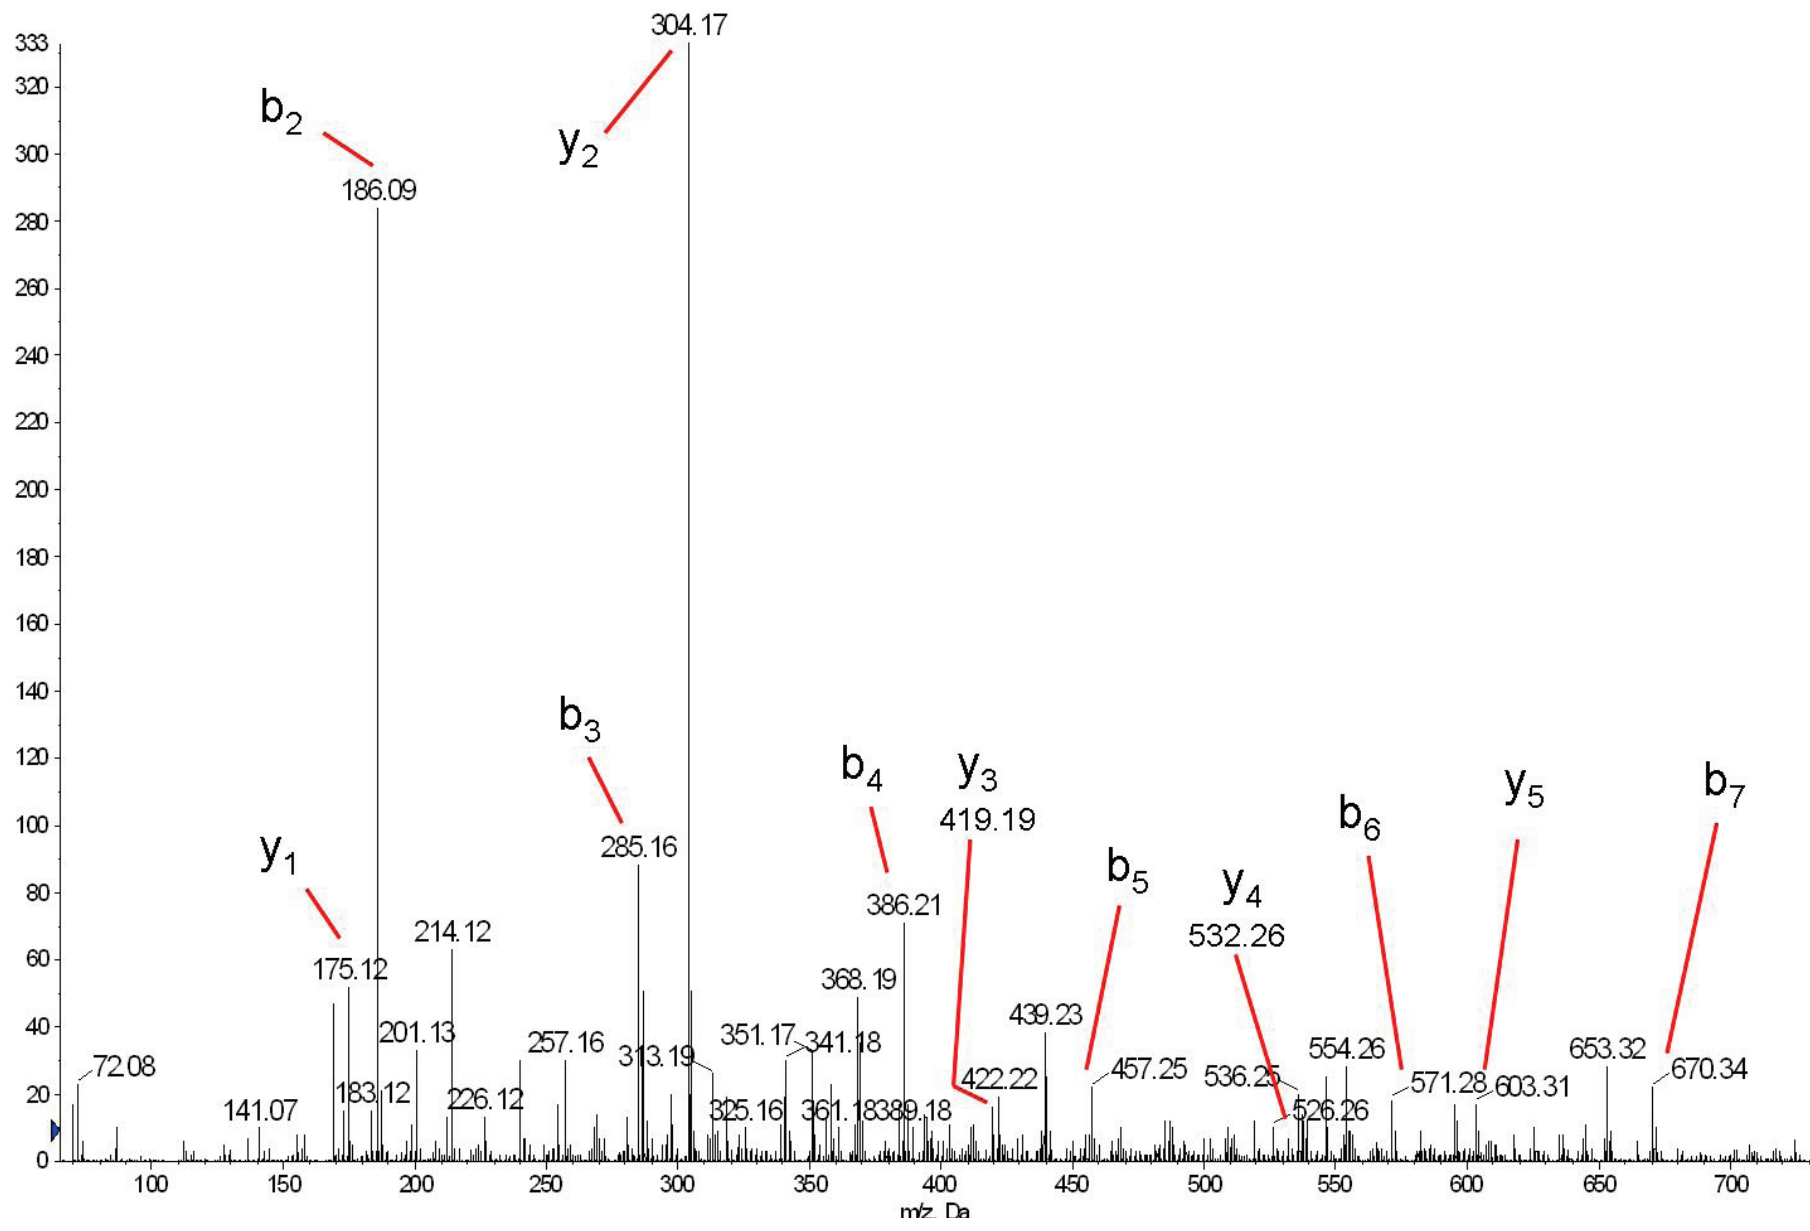

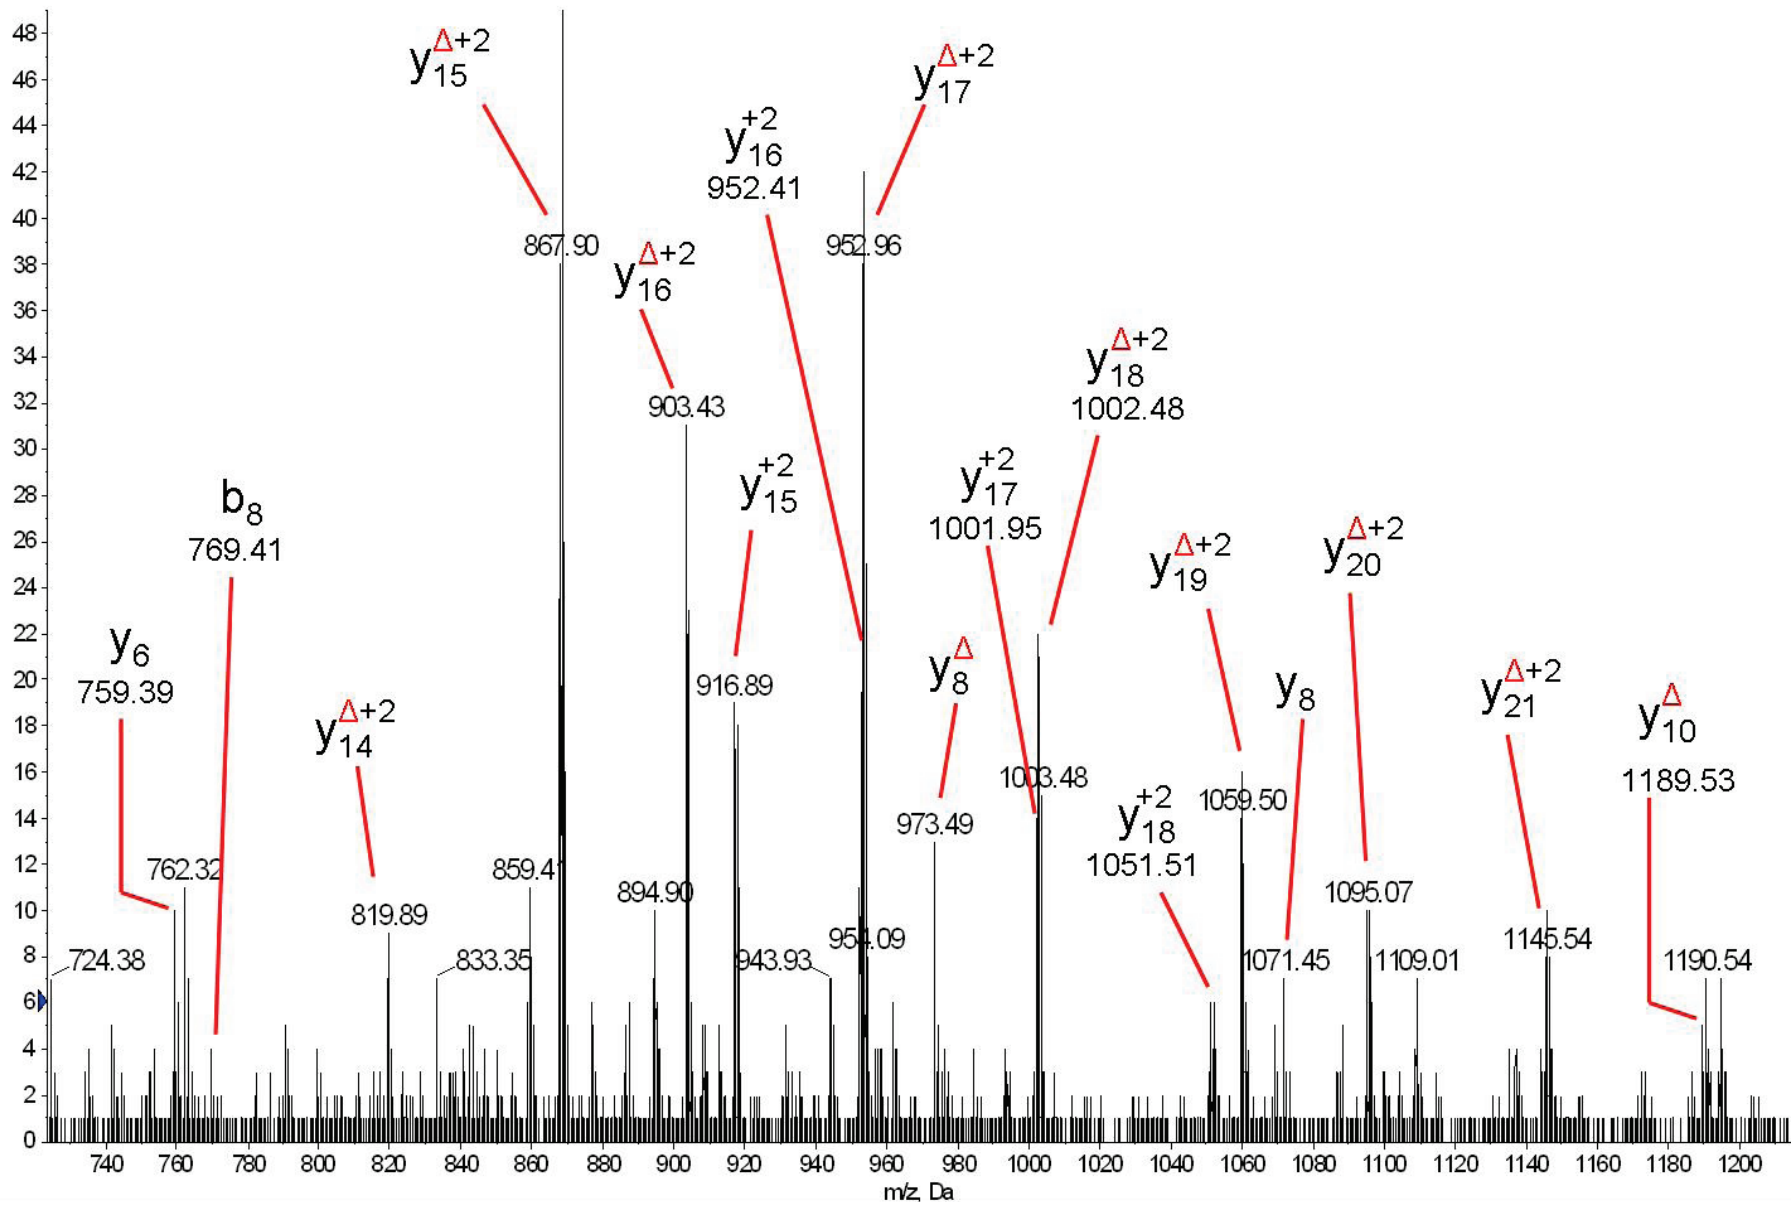

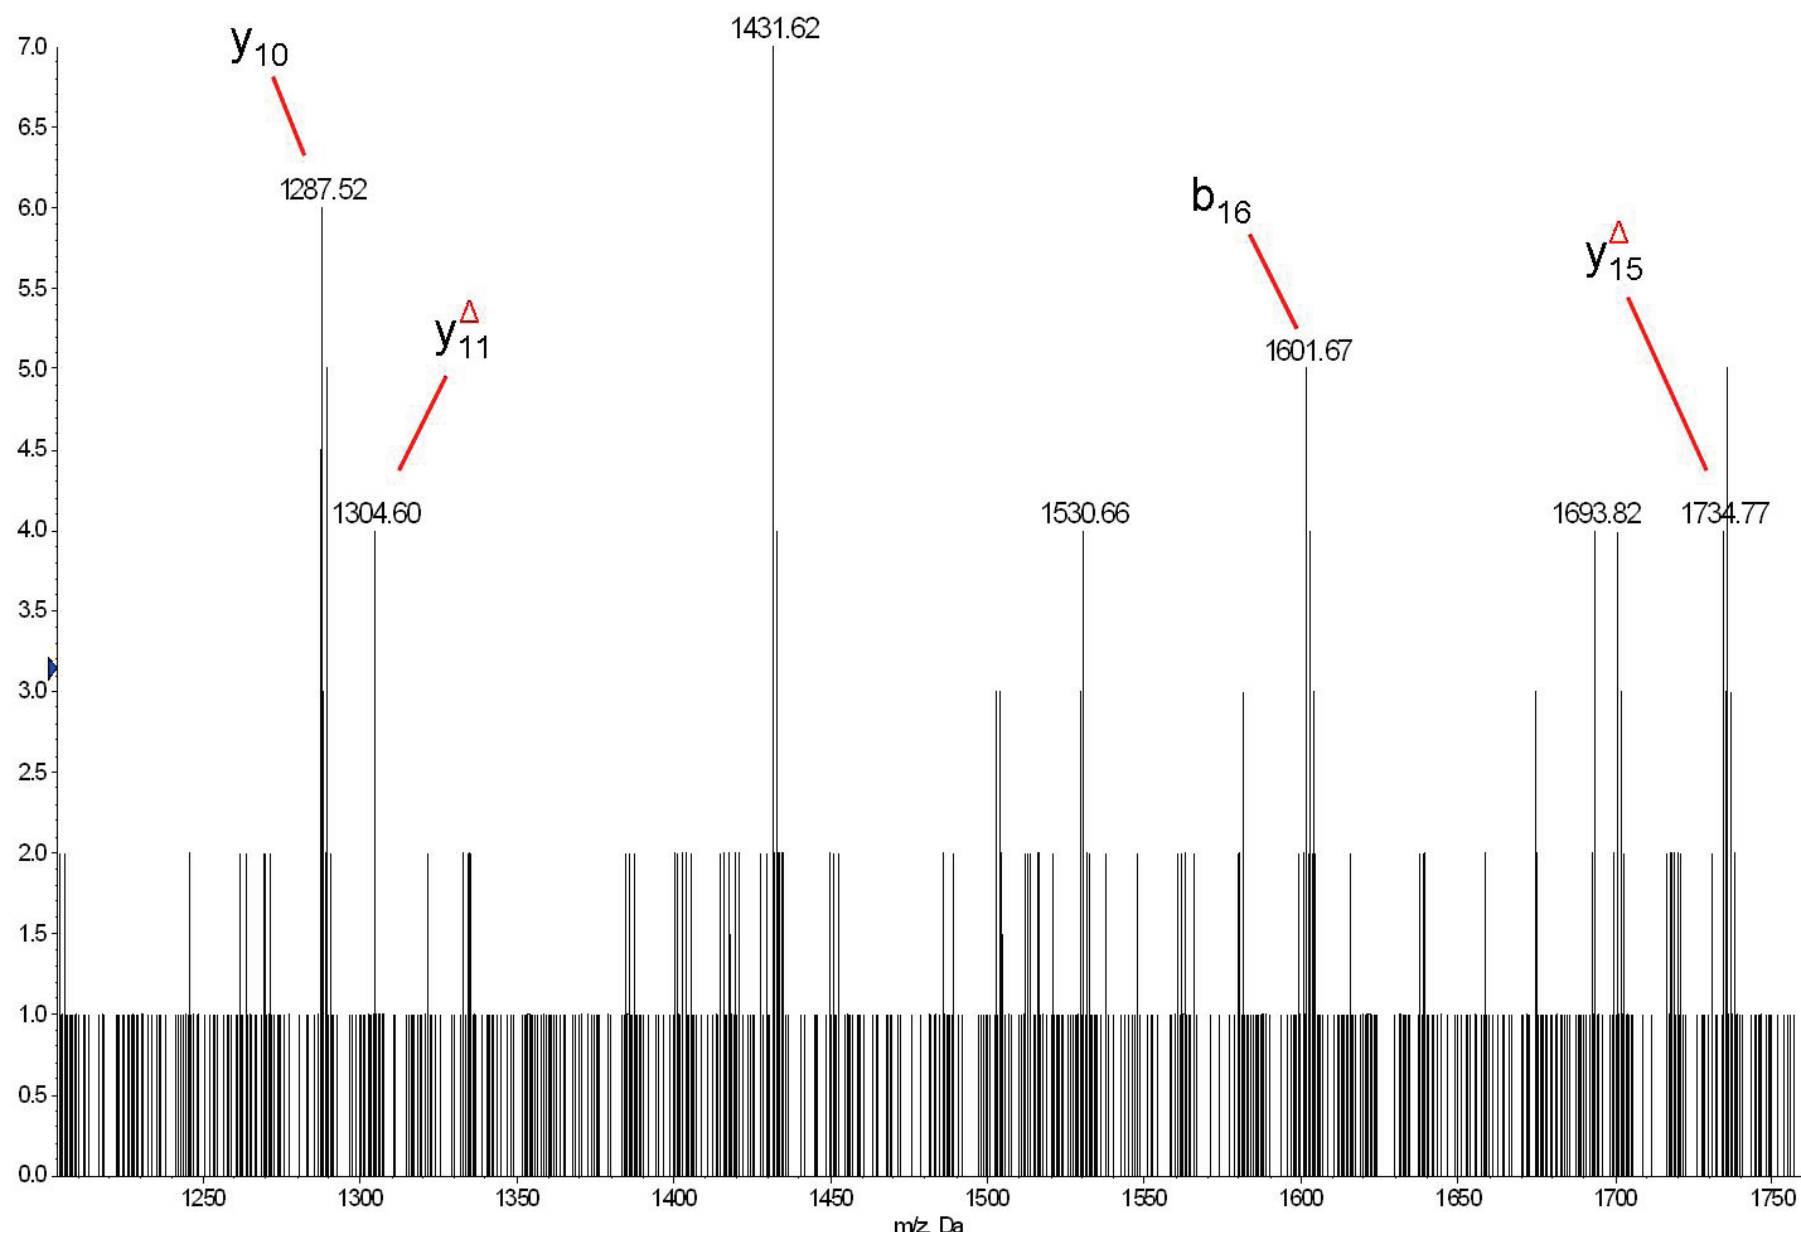

**Figure S2**

Tryptic peptide with no missed cleavage with the characteristic phosphorylation on the Threonine 21 residue from *in vitro* phosphorylated MabA (Monoisotopic mass : 981.48 Da, MS/MS of the doubly charged ion at m/z 491.7).

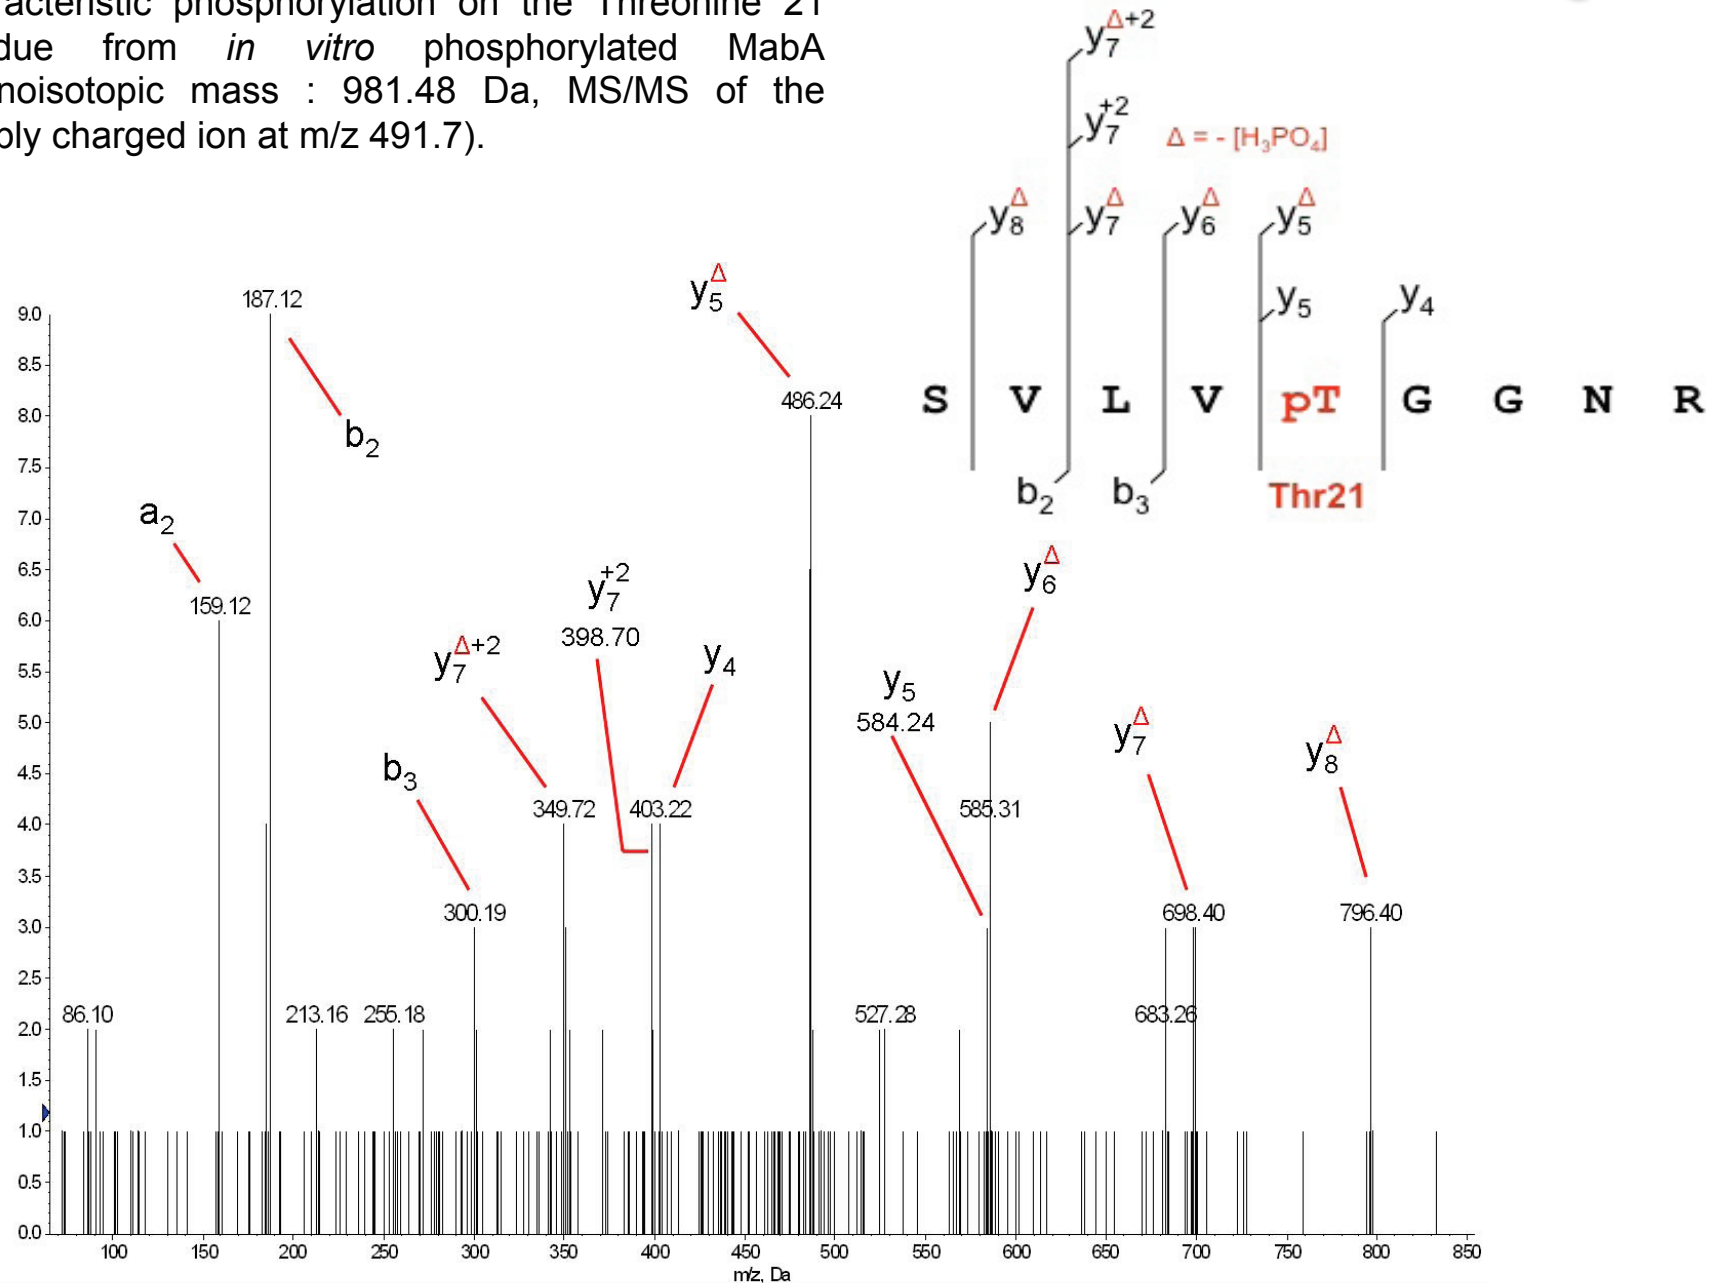

Tryptic peptide with no missed cleavage with the characteristic phosphorylation on the Threonine 114 residue from *in vitro* phosphorylated MabA(Monoisotopic mass : 1254.62 Da, MS/MS of the doubly charged ion at m/z 628.3).

**Figure S3**

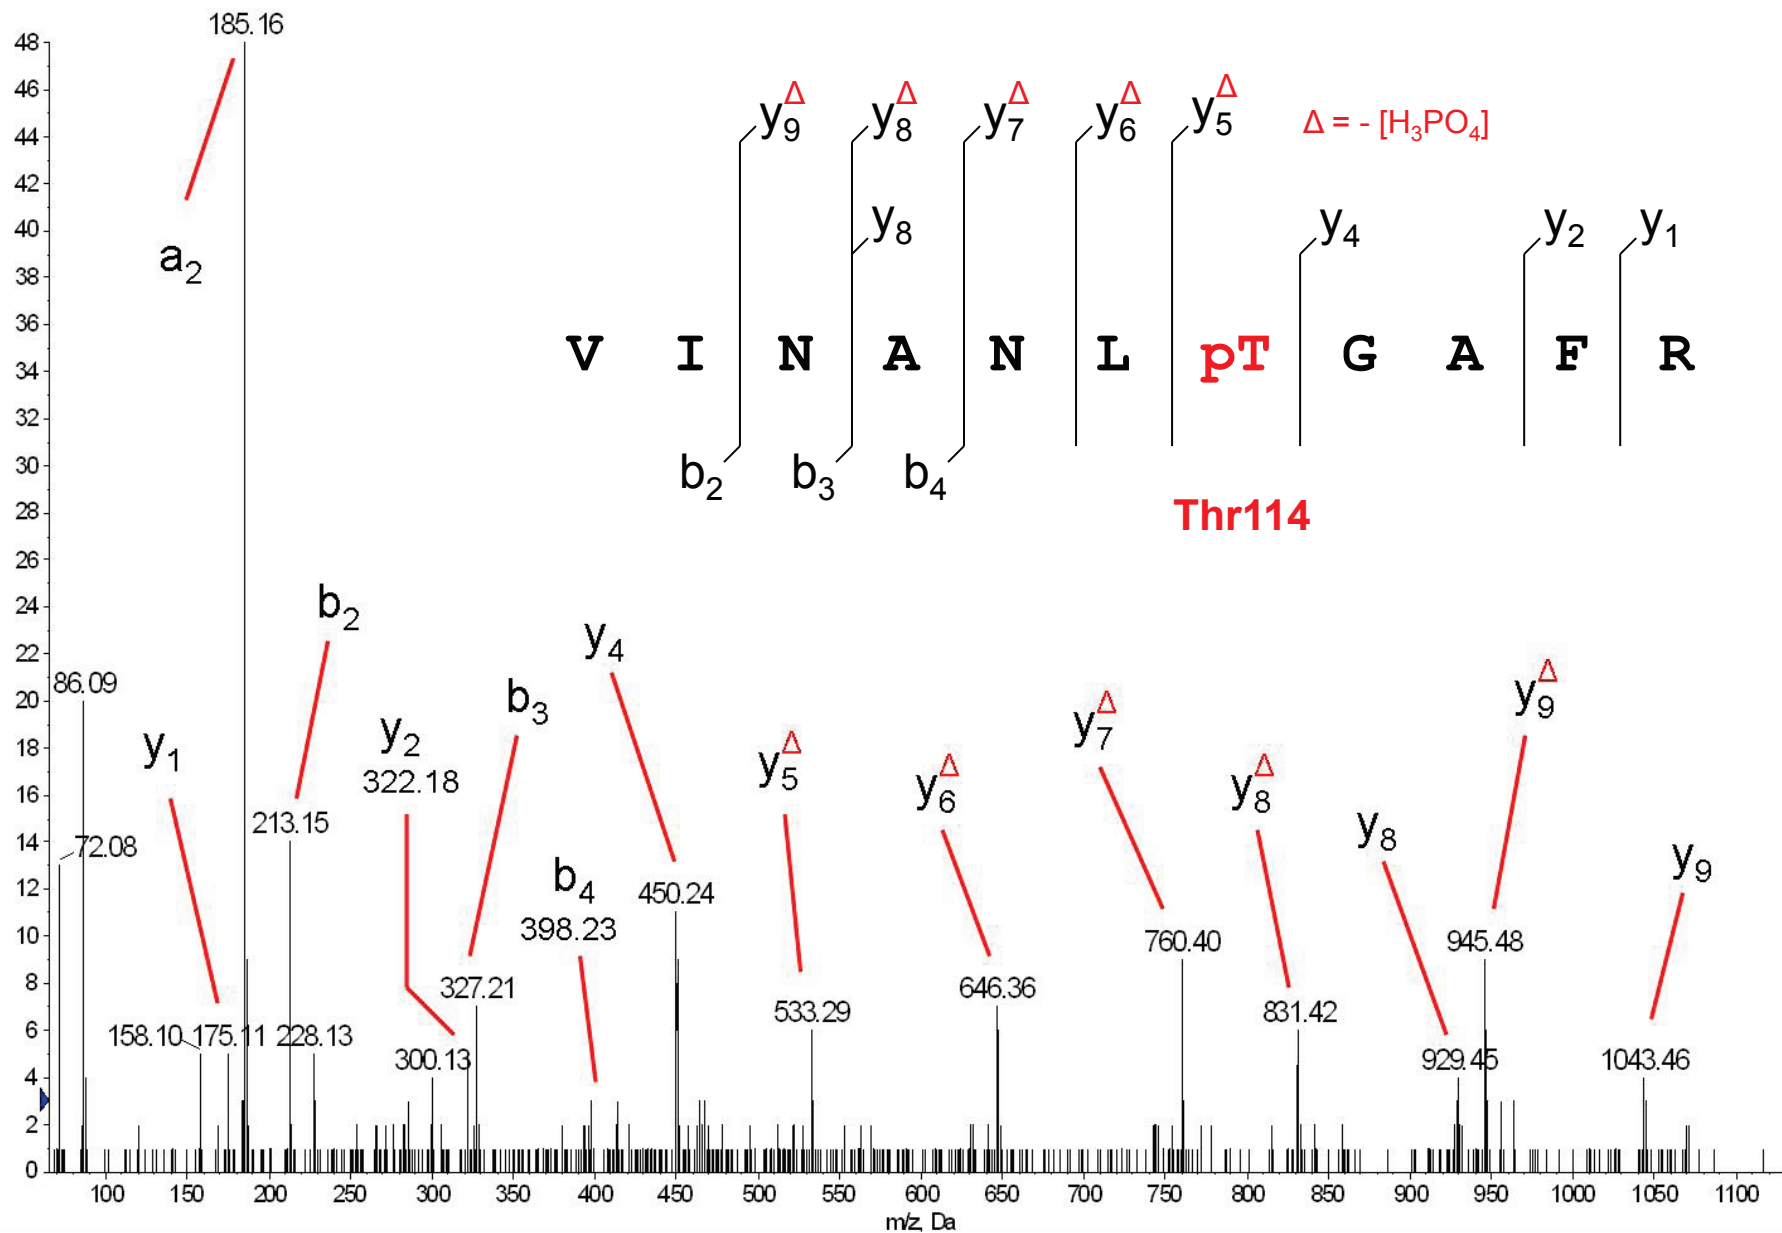

**Figure S4**

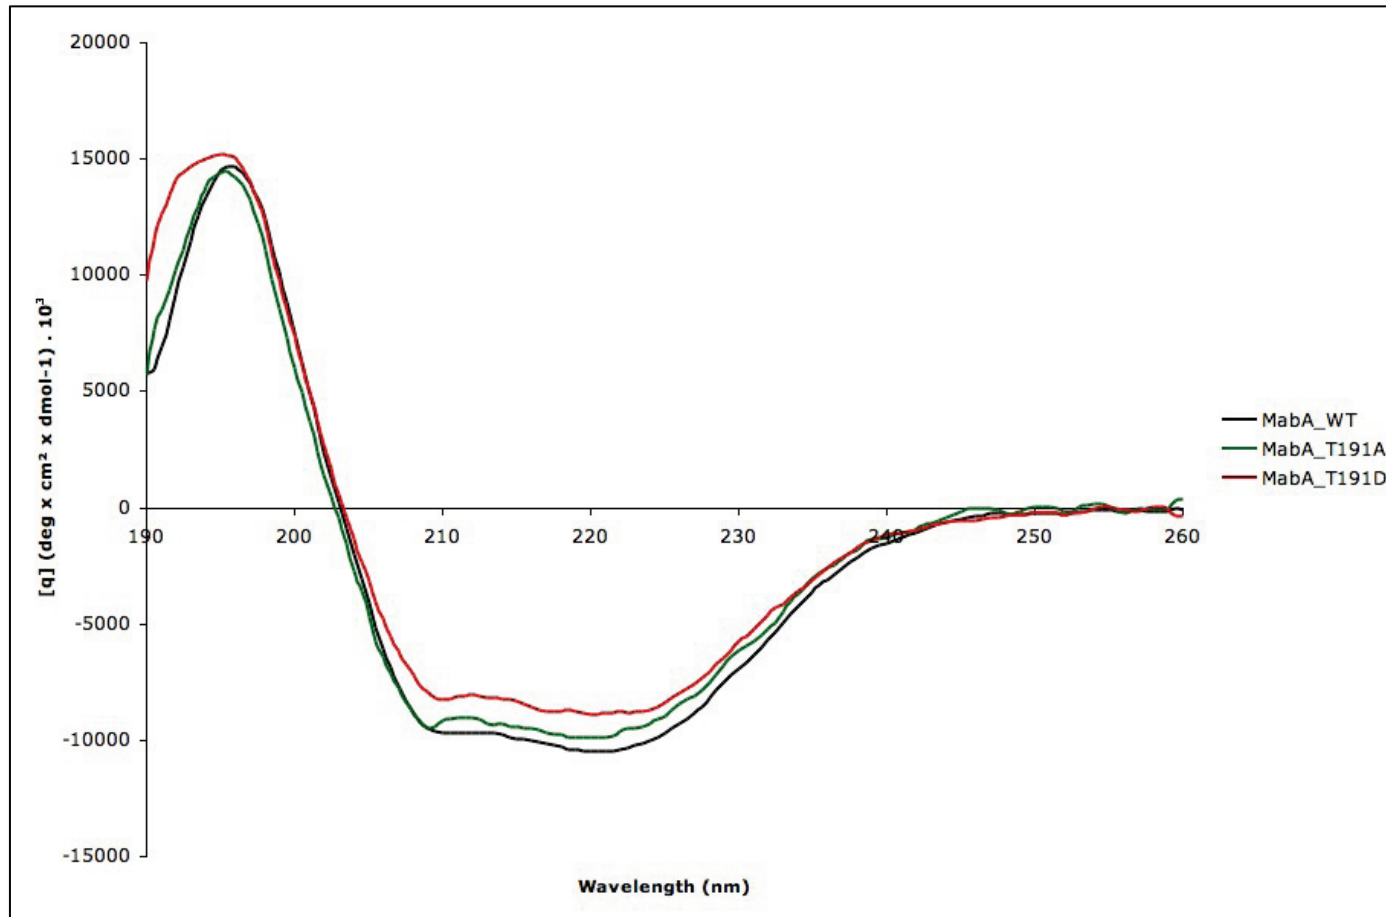

**Comparison of CD spectra for MabA\_WT, MabA\_T191A and MabA\_T191D.** CD spectra were obtained using a Chirascan spectrophotometer (Applied Photophysics) at a protein concentration of approximately 1mg/ml in buffer 50 mM Tris/HCl pH 7.5, 150 mM NaCl, 10% glycerol, 1 mM DTT, 1 mM EDTA.

**Table S1.** Bacterial Strains and Plasmids used in this study

| Strains or Plasmids                    | Genotype or Description                                                                                                                                                                      | Source or Reference |
|----------------------------------------|----------------------------------------------------------------------------------------------------------------------------------------------------------------------------------------------|---------------------|
| <i>E. coli</i> TOP10                   | F <sup>-</sup> <i>mcrA</i> $\Delta(mrr-hsdRMS-mcrBC)$<br>$\phi 80lacZAM15 \Delta lacX74 deoR recA1 araD139$<br>$\Delta(ara-leu)7697 galU galK rpsL endA1 nupG$ ;<br>used for general cloning | Invitrogen          |
| <i>E. coli</i> BL21(DE3)Star           | F2 <i>ompT hsdSB(rB2 mB2) gal dcm</i> (DE3);<br>used to express recombinant proteins in <i>E. coli</i>                                                                                       | Stratagene          |
| <i>M. bovis</i> BCG 1173P2             | Vaccine strain                                                                                                                                                                               | WHO, Stockholm      |
| pETPhos                                | pET15b (Novagen) derivative including the replacement of the thrombin site coding sequence with a tobacco etch virus (TEV) protease site and Ser to Gly mutagenesis in the N-term His-tag    | (1)                 |
| pETPhos_ <i>mabA</i> _WT               | pETPhos derivative used to express His-tagged fusion of MabA in <i>E. coli</i>                                                                                                               | This work           |
| pETPhos_ <i>mabA</i> _T21A             | pETPhos derivative used to express His-tagged fusion of MabA_T21A in <i>E. coli</i>                                                                                                          | This work           |
| pETPhos_ <i>mabA</i> _T114A            | pETPhos derivative used to express His-tagged fusion of MabA_T114A in <i>E. coli</i>                                                                                                         | This work           |
| pETPhos_ <i>mabA</i> _T191A            | pETPhos derivative used to express His-tagged fusion of MabA_T191A in <i>E. coli</i>                                                                                                         | This work           |
| pETPhos_ <i>mabA</i> _T21A/T191A       | pETPhos derivative used to express His-tagged fusion of MabA_T21A/191A in <i>E. coli</i>                                                                                                     | This work           |
| pETPhos_ <i>mabA</i> _T21A/T114A/T191A | pETPhos derivative used to express His-tagged fusion of MabA_T21A/191A in <i>E. coli</i>                                                                                                     | This work           |
| pETPhos_ <i>mabA</i> _T21D             | pETPhos derivative used to express His-tagged fusion of MabA_T21D in <i>E. coli</i>                                                                                                          | This work           |
| pETPhos_ <i>mabA</i> _T114D            | pETPhos derivative used to express His-tagged fusion of MabA_T114D in <i>E. coli</i>                                                                                                         | This work           |
| pETPhos_ <i>mabA</i> _T191D            | pETPhos derivative used to express His-tagged fusion of MabA_T191D in <i>E. coli</i>                                                                                                         | This work           |
| pMK1                                   | <i>E. coli</i> /mycobacterial shuttle vector, allows expression of N-term His-tagged proteins, derived from pMV261 (2) and containing the pET28a polylinker                                  | This work           |
| pMK1_ <i>mabA</i> _WT                  | pMK1 derivative used to express His-tagged fusion of MabA in mycobacteria                                                                                                                    | This work           |
| pMK1_ <i>mabA</i> _T21A                | pMK1 derivative used to express His-tagged fusion of MabA_T21A in mycobacteria                                                                                                               | This work           |
| pMK1_ <i>mabA</i> _T114A               | pMK1 derivative used to express His-tagged fusion of MabA_T114A in mycobacteria                                                                                                              | This work           |



|                          |                                                                                 |           |
|--------------------------|---------------------------------------------------------------------------------|-----------|
| pMK1_ <i>mabA_T191A</i>  | pMK1 derivative used to express His-tagged fusion of MabA_T191A in mycobacteria | This work |
| pMK1_ <i>mabA_T21D</i>   | pMK1 derivative used to express His-tagged fusion of MabA_T21D in mycobacteria  | This work |
| pMK1_ <i>mabA_T114D</i>  | pMK1 derivative used to express His-tagged fusion of MabA_T114D in mycobacteria | This work |
| pMK1_ <i>mabA_T191D</i>  | pMK1 derivative used to express His-tagged fusion of MabA_T191D in mycobacteria | This work |
| pSD26                    | Mycobacterial acetamide-inducible expression vector                             | (3)       |
| pSD26_ <i>mabA_WT</i>    | pSD26 derivative used to induce His-tagged fusion of MabA in mycobacteria       | This work |
| pSD26_ <i>mabA_T191A</i> | pSD26 derivative used to induce His-tagged fusion of MabA_T191A in mycobacteria | This work |
| pSD26_ <i>mabA_T191D</i> | pSD26 derivative used to induce His-tagged fusion of MabA_T191D in mycobacteria | This work |

**Table S2.** Primers used in this study

| Primers        | 5' to 3' Sequence <sup>ab</sup>                  |
|----------------|--------------------------------------------------|
| pMK1 MabA dir  | accact <u>catatg</u> actgccacagccactgaag (NdeI)  |
| pMK1 MabA rev  | <u>cgaattc</u> gcagcgtccttggtgtgtcagt (EcoRI)    |
| pSD26 MabA dir | gtgactgccacagccactgaag                           |
| pSD26 MabA rev | gtggccatacccatgccgc                              |
| MabA T21A dir  | cccgttcagtctggtt <b>g</b> cggaggaaaccgggggatcgg  |
| MabA T21A rev  | ccgatccccggtttctc <b>cg</b> caaccaggactgaacggg   |
| MabA T114A dir | aggtcatcaacccaacct <b>g</b> cggggcggtccgggtggc   |
| MabA T114A rev | gccaccgggaacgcccc <b>g</b> cgaggtggcggtgatgacct  |
| MabA T191A dir | gctacatcgacaccgatatggcccgcgctggatgagcg           |
| MabA T191A rev | cgctcatccagcgcgggccatcgggtcgcgatgtagc            |
| MabA T21D dir  | atcccgttcagtctggtt <b>g</b> acggaggaaaccgggggatc |
| MabA T21D rev  | gatccccggtttctc <b>cg</b> caaccaggactgaacgggat   |
| MabA T114D dir | ggtcatcaacccaacct <b>g</b> acggggcggtccgggtggct  |
| MabA T114D rev | agccaccgggaacgcccc <b>g</b> tcgaggtggcggtgatgacc |
| MabA T191D dir | ctacatcgacaccgatat <b>g</b> accgcgctggatgagcgg   |
| MabA T191D rev | ccgctcatccagcgcggt <b>tc</b> catcgggtcgcgatgtag  |

<sup>a</sup> Restriction sites are underlined and specified into brackets.

<sup>b</sup> Mutagenized bases are shown in bold.

## References

1. Canova, M. J., Kremer, L., and Molle, V. (2008) *Plasmid* **60**(2), 149-153
2. Stover, C. K., de la Cruz, V. F., Fuerst, T. R., Burlein, J. E., Benson, L. A., Bennett, L. T., Bansal, G. P., Young, J. F., Lee, M. H., Hatfull, G. F., and et al. (1991) *Nature* **351**(6326), 456-460
3. Daugelat, S., Kowall, J., Mattow, J., Bumann, D., Winter, R., Hurwitz, R., and Kaufmann, S. H. (2003) *Microbes Infect* **5**(12), 1082-1095
